# Supplementary material
Source: PubMed Central journal article supplement (PMC123066)

□□□ □  
 □□□□□□ □

Alveolates

Dinoflagellates

Apicomplexans

Ciliates

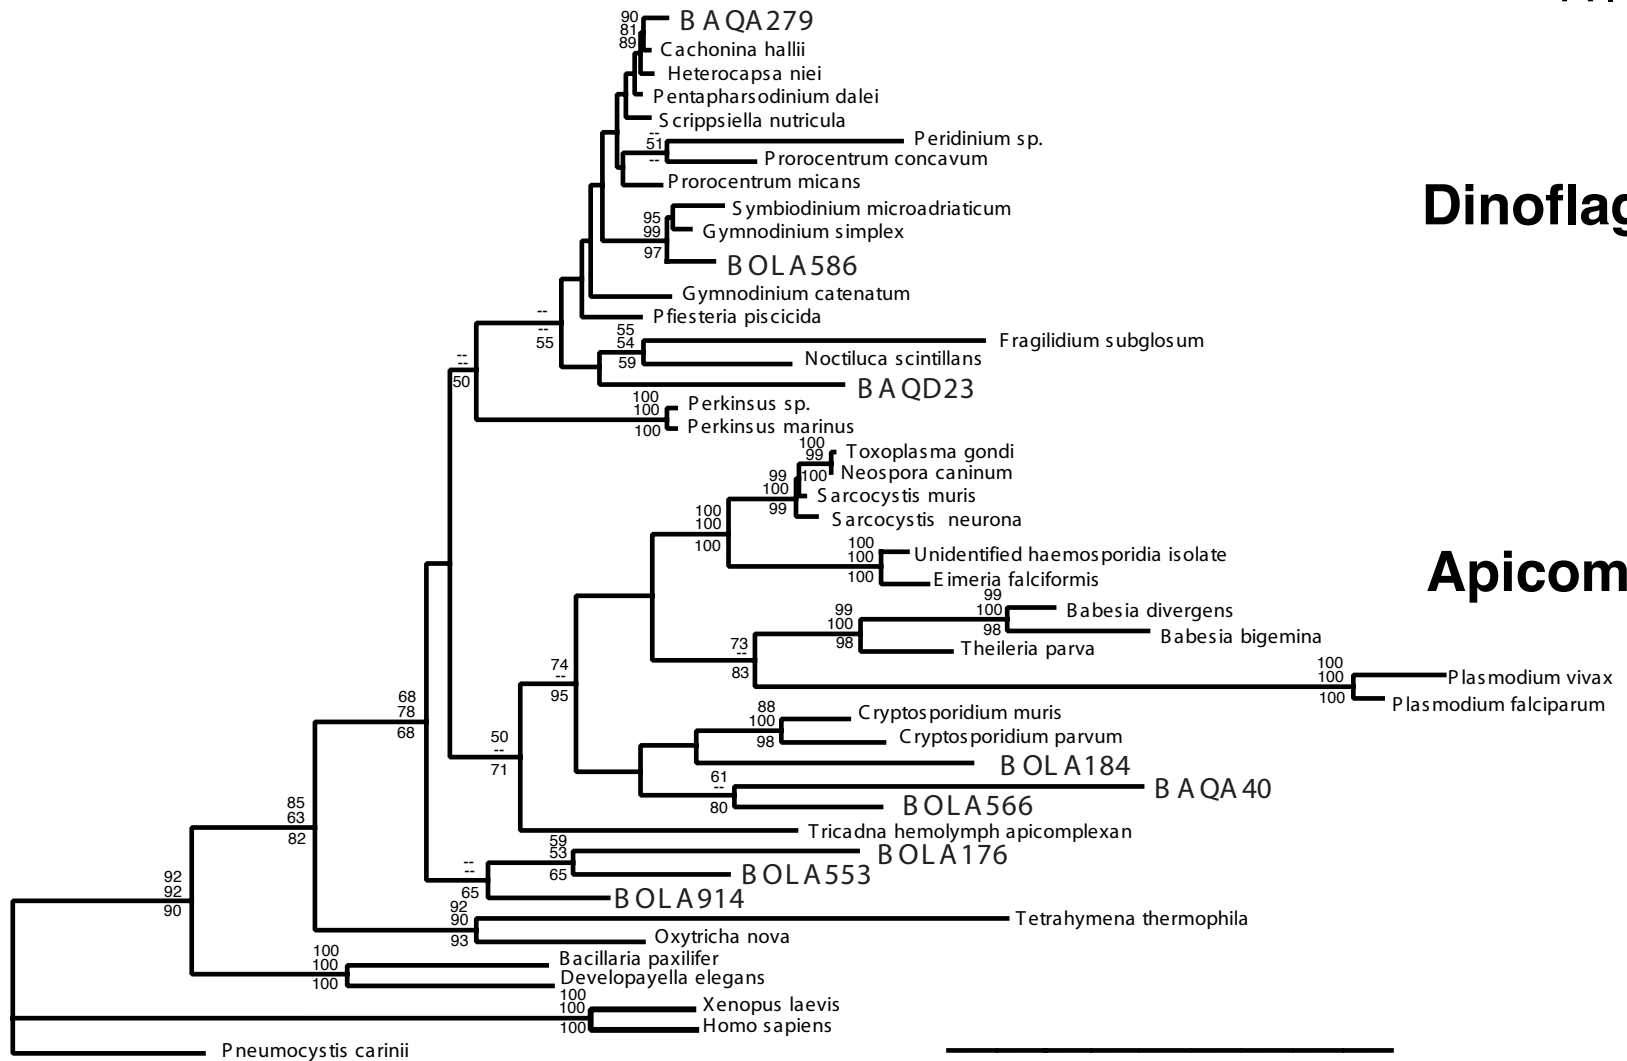

0.10 changes/site

Supplement: pnas_99_12_8324__4.pdf [file pnas_99_12_8324__4.pdf]

□□□□□□□□□□ □

□□ □  
□□□□

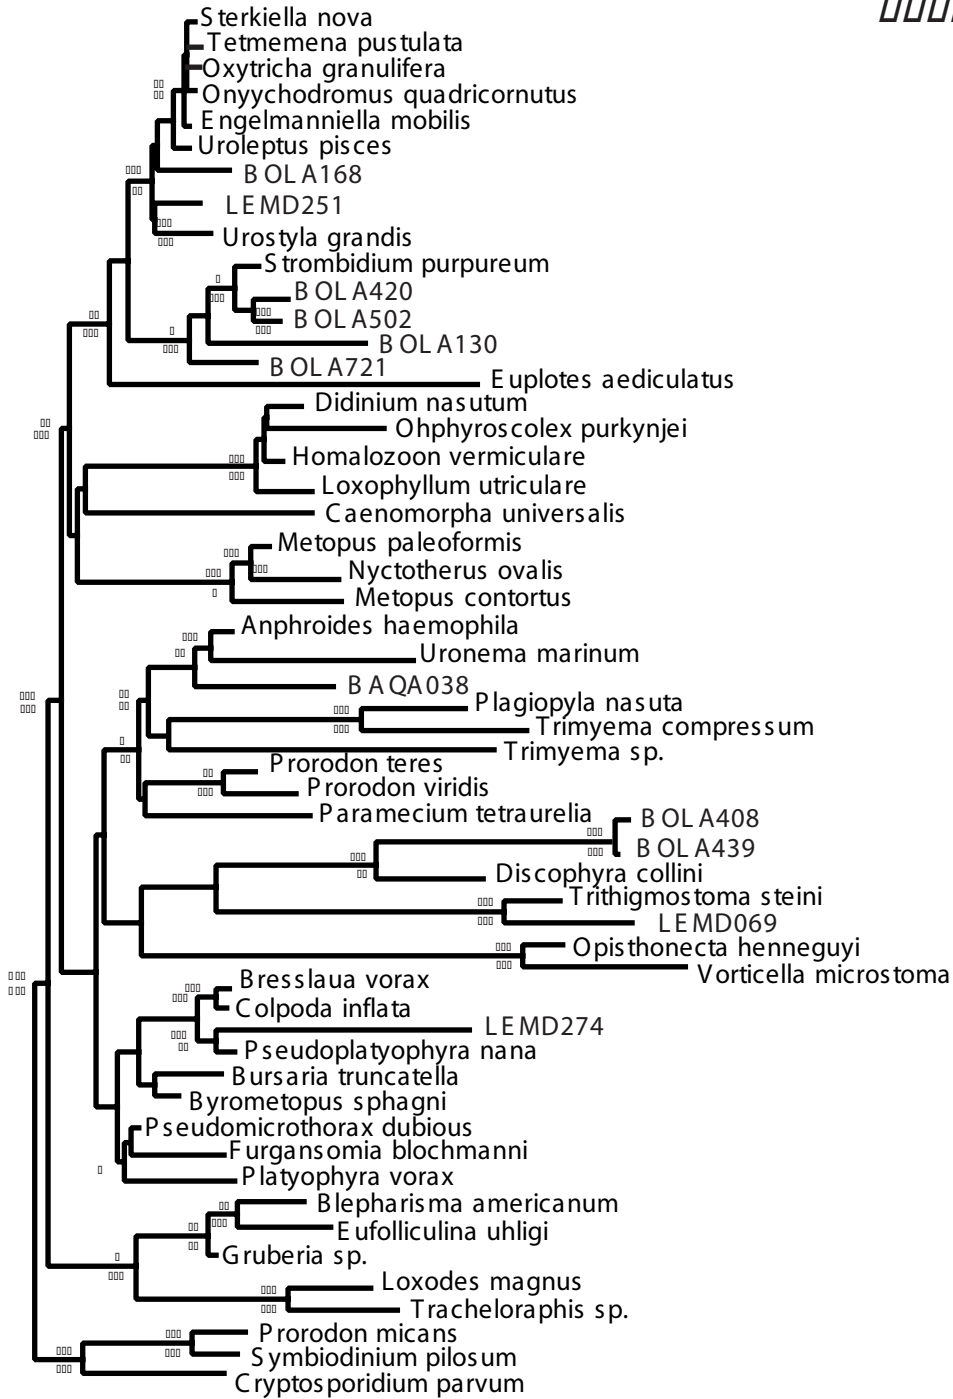

0.01 changes

Supplement: pnas_99_12_8324__5.pdf [file pnas_99_12_8324__5.pdf]

□ □□□ □  
□□ □□

□ □□ □□□□ □ □□□ □□ □□ □□□□ □ □□

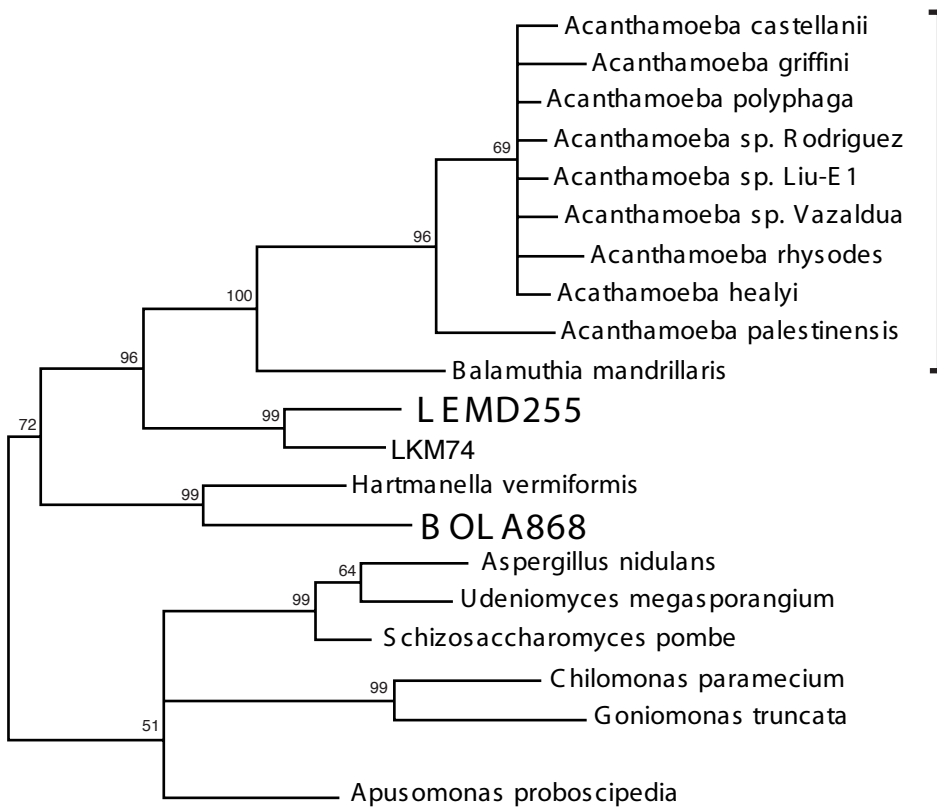

□ □□ □□□□ □ □□

□□□  
□□□□□ □□□  
□

Supplement: pnas_99_12_8324__6.pdf [file pnas_99_12_8324__6.pdf]
